# Supplementary material for: The long-term impact of biogenic volatile organic compound emissions on urban ozone patterns over central Europe: contributions from urban and rural vegetation
Source: Copernicus journal article supplement (doi:10.5194/acp-24-13541-2024), 2024-12-10

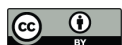

*Supplement of*

**The long-term impact of biogenic volatile organic compound emissions on urban ozone patterns over central Europe: contributions from urban and rural vegetation**

**Marina Liaskoni et al.**

*Correspondence to:* Peter Huszár ([peter.huszar@matfyz.cuni.cz](mailto:peter.huszar@matfyz.cuni.cz))

The copyright of individual parts of the supplement might differ from the article licence.

## List of Airbase stations used in the study

### Ozone

117 background stations selected below 800 m ASL from Austria, Czechia, Germany, Hungary, Slovakia and Poland

Rural areas:

AT30202, AT10002, AT60151, AT53055, AT60190, AT72538, AT30103, AT30502, AT0ENK1, AT31904, AT30403, AT0PIL1, AT2WO35, AT31701, AT2SP10, AT56071, AT31204, AT60185, AT30701, AT32101, AT30801, AT30603, AT0ILL1, AT30302, CZ0MJES, CZ0BKUC, CZ0LSOU, CZ0JKMY, CZ0TSTD, CZ0SONR, CZ0USNZ, CZ0ZSNV, CZ0TCER, CZ0PPRM, CZ0ULOM, CZ0UTUS, CZ0BMIS, CZ0CKOC, CZ0ESVR, CZ0JKOS, DENI060, DENI059, DEBE032, DESL019, DERP016, DEBY004, DEBW087, DERP017, DEUB001, DESH013, DESH014, DEBW004, DENI058, DERP028, DEBE027, DEBY047, DEHE024, DEHE060, DEUB005, DENI063, DEUB028, DENW065, DEBY013, DEHE046, DEBE062, DEBB053, DEMV012, DEMV017, DEBB066, DEMV004, DEHE028, DERP013, DETH026, DESN076, DEBB065, DESN074, DEBY109, DETH042, DESN079, DESN080, DEST089, DESN051, DEST098, DENW081, DETH061, DENW068, DEUB030, DERP014, DEBE056, DEHE026, DEBY049, DERP015, DESH008, DEHE042, DENI031, DENW064, DESH001, DEBY072, DEHE043, HU0002R, HU0040A, PL0002R, PL0028A, PL0005R, PL0014A, PL0077A, PL0094A, PL0105A, PL0121A, PL0128A, PL0150A, PL0182A, PL0211A, PL0243A, PL0247A, SK0041A, SK0006R

For cities, urban and suburban background stations were selected:

Berlin – DEBE034, DEBE051, DEBE010

Budapest – HU0036A, HU0022A, HU0042A

Munich – DEBY089, DEBY039"

Prague – CZ0ALIB, CZ0AKOB, CZ0ASTO, CZ0ASUC, CZ0ARIE

Vienna – AT900ZA, AT90LOB, AT90LAA, AT9STEF

Warsaw – PL0044A, PL0141A, PL0143A

### NO<sub>2</sub>

105 stations – subset of the “ozone” stations above

AT30202, AT10002, AT60151, AT53055, AT72538, AT30502, AT0ENK1, AT31904, AT30403, AT0PIL1, AT2WO35, AT31701, AT2SP10, AT31204, AT0ILL1, AT30302, AT32604, CZ0MJES, CZ0TSTD, CZ0USNZ, CZ0TCER, CZ0PPRM, CZ0ULOM, CZ0UTUS, CZ0BMIS, CZ0JKOS, CZ0HPLO, DENI060, DENI059, DEBE032, DESL019, DERP016, DEBY004, DEBW087, DERP017, DEUB001, DENI058, DERP028, DEBE027, DEHE024, DEHE060, DEUB005, DENI063, DEUB028, DENW065, DEBY013, DEHE046, DEBE062, DEBB053, DEMV012, DEMV017, DEBB066, DEMV004, DEHE028, DERP013, DETH026, DESN076, DEBB065, DESN074, DEBY109, DETH042, DESN079, DEST089, DESN051, DEST098, DENW081, DETH061, DENW068, DERP014, DEHE026, DERP015, DESH008, DEHE042, DENI031, DEBY072, DEHE043, DENI077, DEST104, DEHE039, DEBY124, DEBY123, DEBW004, DEUB030, DEBE056, DEBY049, DENW064, DEMV024, DEMV026, DEHE050, HU0040A, PL0028A, PL0014A, PL0077A, PL0094A, PL0105A, PL0121A, PL0128A, PL0150A, PL0182A, PL0211A, PL0243A, PL0247A, PL0349A, PL0068A, PL0561A

For cities, urban and suburban background stations were selected:

Berlin - DEBE034, DEBE051, DEBE010

Munich - DEBY089, DEBY039

Prague - CZ0ALIB, CZ0AKOB, CZ0ASUC, CZ0ARIE

Vienna - AT900ZA, AT90LOB, AT90LAA, AT9STEF

Budapest - HU0036A, HU0022A, HU0042A

Warsaw - PL0141A, PL0143A

## Figures and tables

Figure S1: The average JJA impact of all BVOC emissions on the maximum daily 8hour ozone (MDA8) for each simulated years in ppbv.

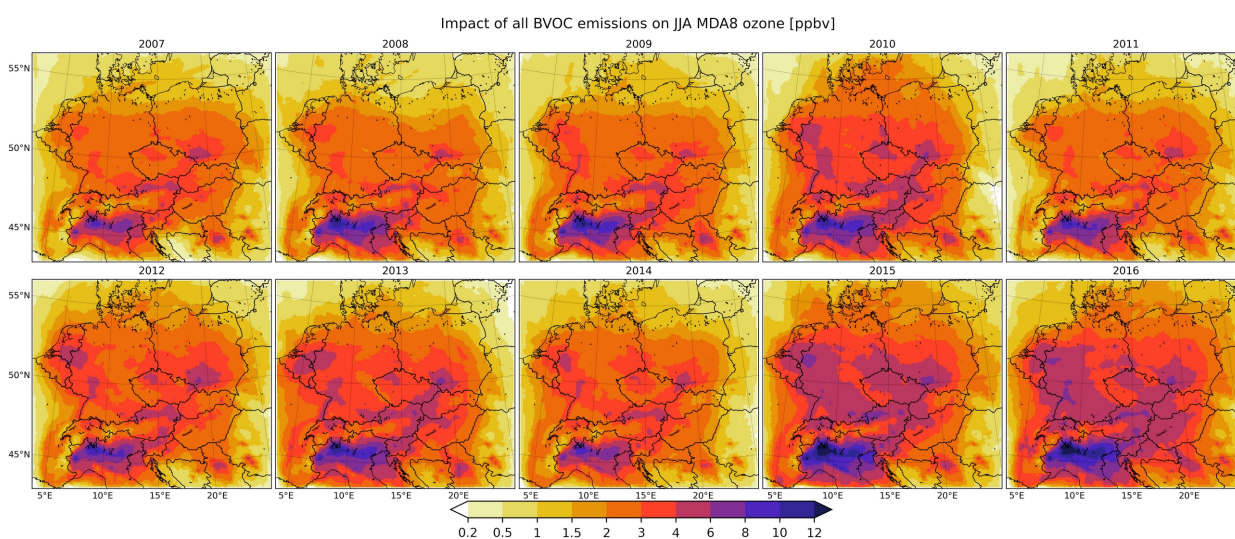

Figure S2: The average JJA relative impact of all BVOC emissions on the maximum daily 8hour ozone (MDA8) for each simulated years in %.

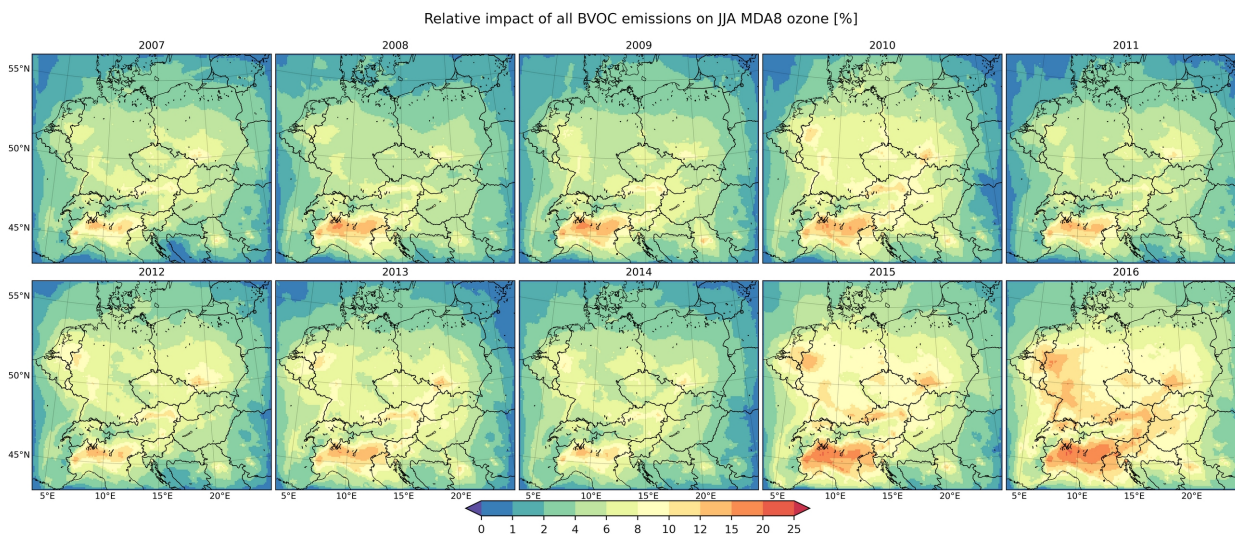

Figure S3: The average JJA impact of all BVOC emissions on the maximum daily hourly OH for each simulated years in  $\text{pgm}^{-3}$ .

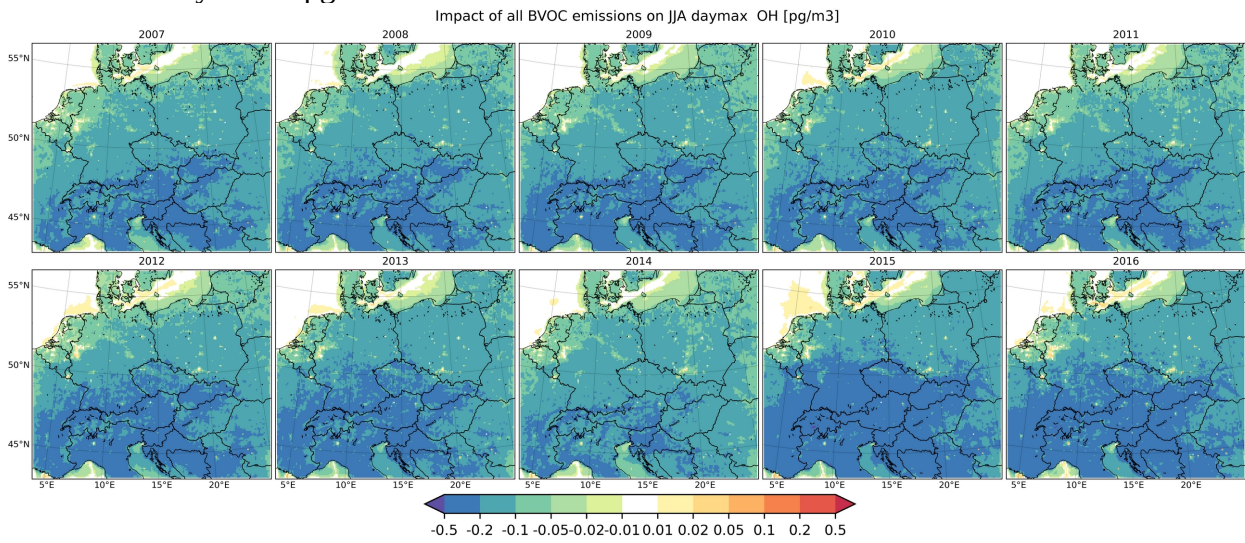

Figure S4: The average JJA relative impact of all BVOC emissions on the maximum daily hourly OH for each simulated years in %.

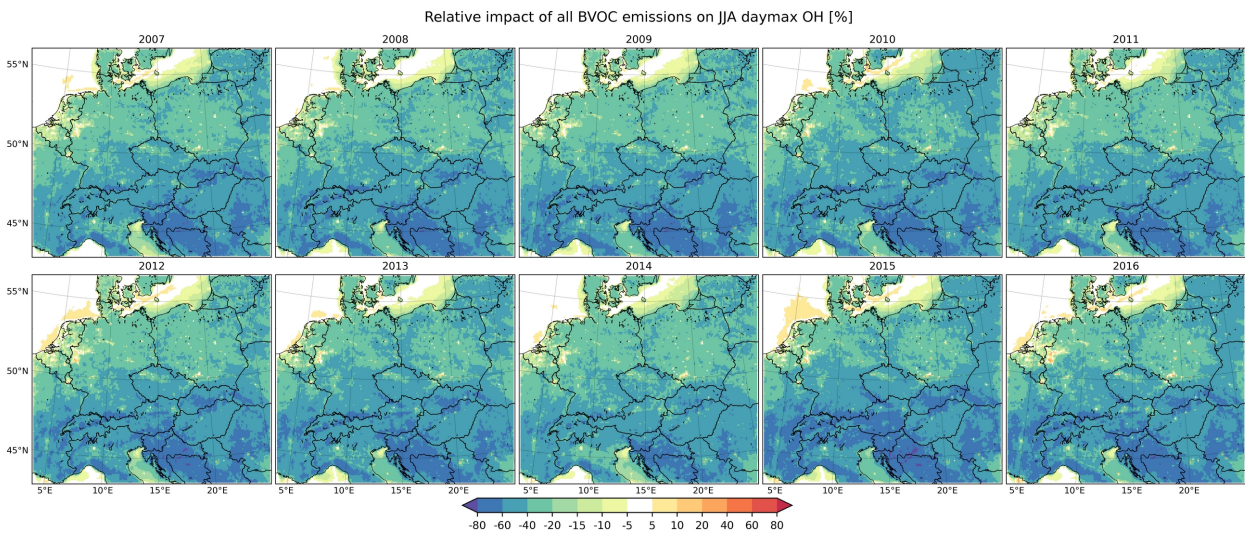

Figure S5: The average JJA impact of all BVOC emissions on the daily mean FORM for each simulated years in ppbv.

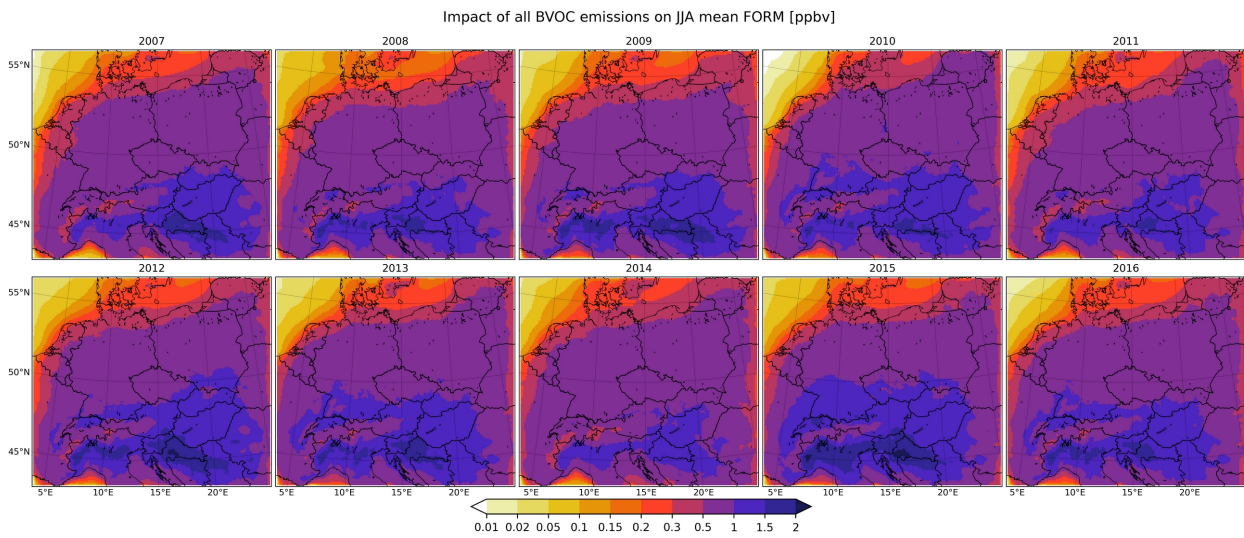

Figure S6: The average JJA relative impact of all BVOC emissions on the daily mean FORM for each simulated years in %.

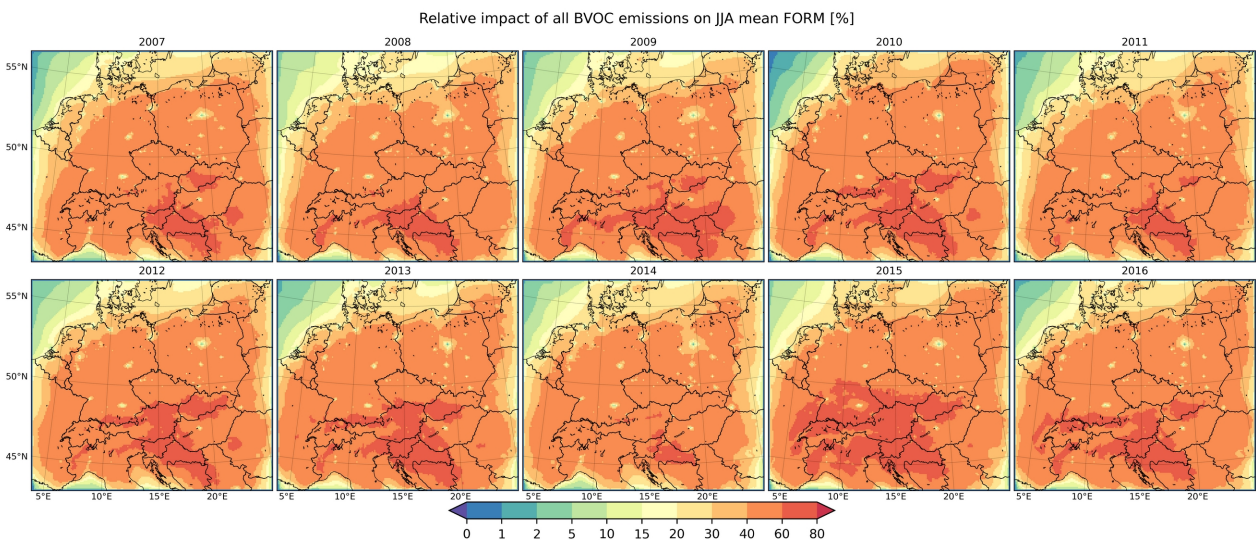

Supplement: Supplementary file 1 [file acp-24-13541-2024-supplement.pdf]
